# Supplementary material for: The structural, electronic and thermodynamic properties of the designed p -benzoquinone based dicationic ionic liquids: insight from DFT–GD3 and QTAIM
Source: Royal Society of Chemistry journal article supplement (doi:10.1039/d4me00119b), 2024-10-10
Supplement: d4me00119b1.pdf [file d4me00119b1.pdf]

### Supplementary Data File

**Table S1.** The vibrational frequency of the selected bonds in [BTAD][A1-8]<sub>2</sub>, (BTAD= [C<sub>6</sub>H<sub>4</sub>N<sub>6</sub>O<sub>2</sub>]<sup>2+</sup> and A1-8 = [CH<sub>3</sub>CO<sub>2</sub>]<sup>-</sup>, [CF<sub>3</sub>CO<sub>2</sub>]<sup>-</sup>, [N(CN)<sub>2</sub>]<sup>-</sup>, [CF<sub>3</sub>SO<sub>3</sub>]<sup>-</sup>, [ClO<sub>4</sub>]<sup>-</sup>, [BF<sub>4</sub>]<sup>-</sup>, [NTf<sub>2</sub>]<sup>-</sup> and [PF<sub>6</sub>]<sup>-</sup>) DCILs and corresponding isolated dication at M06-2X/6-31++G(d,p) level of theory.

| $\nu/\text{cm}^{-1}$ | [BTAD] <sup>2+</sup> | [BTAD][A1] <sub>2</sub> | [BTAD][A2] <sub>2</sub> | [BTAD][A3] <sub>2</sub> | [BTAD][A4] <sub>2</sub> |
|----------------------|----------------------|-------------------------|-------------------------|-------------------------|-------------------------|
| N2-H5                | 3494.4               | 3441.1                  | 3529.90                 | 3484.3                  | 3548.6                  |
| N2'-H5'              | 3494.4               | 3441.1                  | 3529.90                 | 3484.3                  | 3548.6                  |
| $\nu/\text{cm}^{-1}$ |                      | [BTAD][A5] <sub>2</sub> | [BTAD][A6] <sub>2</sub> | [BTAD][A7] <sub>2</sub> | [BTAD][A8] <sub>2</sub> |
| N1-H4                | 3509.9               | -                       | -                       | -                       | 3377.9                  |
| N1'-H4'              | 3509.9               | -                       | -                       | -                       | 3377.9                  |
| N2-H5                |                      | 3571.2                  | 3526.4                  | 3484.9                  | 2013.9                  |
| N2'-H5'              |                      | 3571.2                  | 3526.4                  | 3484.9                  | 2013.9                  |
